# Supplementary material for: Occurrence and Quantification of Natural and Microplastic Items in Urban Streams: The Case of Mugnone Creek (Florence, Italy)
Source: MDPI journal article supplement (doi:10.3390/toxics10040159), 2022-03-26

# Supplementary Materials: Occurrence and Quantification of Natural and Microplastic Items in Urban Streams: The Case of Mugnone Creek (Florence, Italy)

Valentina Rimondi, Alessio Monnanni, Eleonora De Beni, Gabriele Bicocchi, David Chelazzi, Alessandra Cincinelli, Sara Fratini, Tania Martellini, Guia Morelli, Stefania Venturi, Pierfranco Lattanzi and Pilario Costagliola

2D Imaging-Fourier Transform Infrared analysis of plastic and non-plastic polymers: visible and 2D FTIR maps, and main absorption bands used for the identification of polymers

For each class of polymer, we report below representative visible and 2D FTIR maps, where the main diagnostic bands are imaged, and the assignments of the characteristic absorptions.

**Figure S1: Acrylonitrile.**

Intense absorption bands in the 3,000-2,800  $\text{cm}^{-1}$  region (C-H stretch), ~2,240 ( $\text{C}\equiv\text{N}$  stretch), 1,739 ( $\text{C}=\text{O}$  stretch), 1,450 ( $\delta_{\text{as}} \text{CH}_2$ ), and 1,360  $\text{cm}^{-1}$  ( $\delta_{\text{s}} \text{CH}_3$ ).

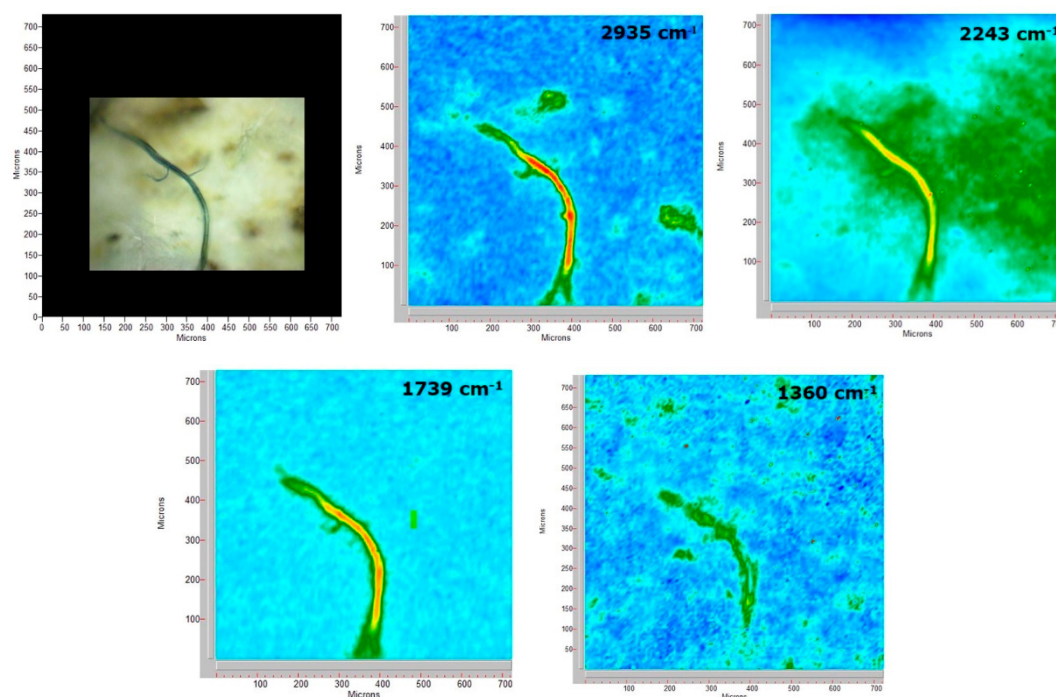

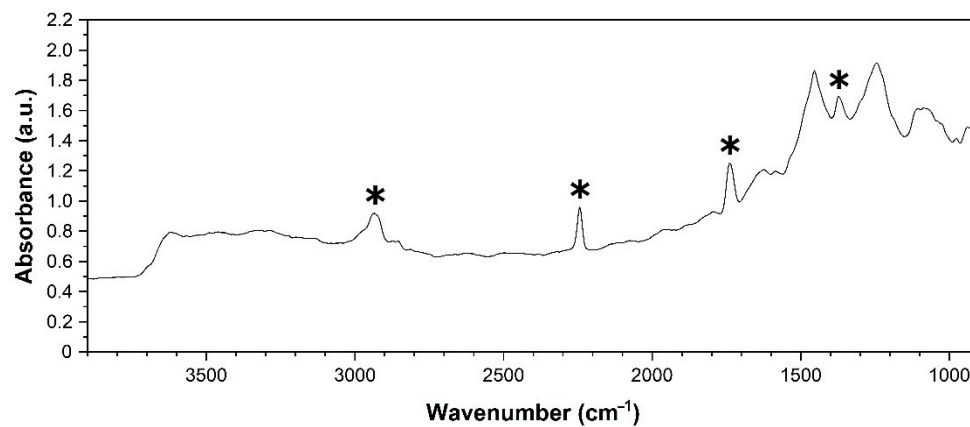

**Figure S2: Polyamide (PA).**

Absorptions in the 3,400-3,300  $\text{cm}^{-1}$  region (N-H stretch), 3,000-2,800 (C-H and  $\text{CH}_2$  stretch), 1,650 (amide I), 1,570 (C(O)-N-H bend, C-N stretch), ~1,450  $\text{cm}^{-1}$  ( $\text{CH}_2$  bend).

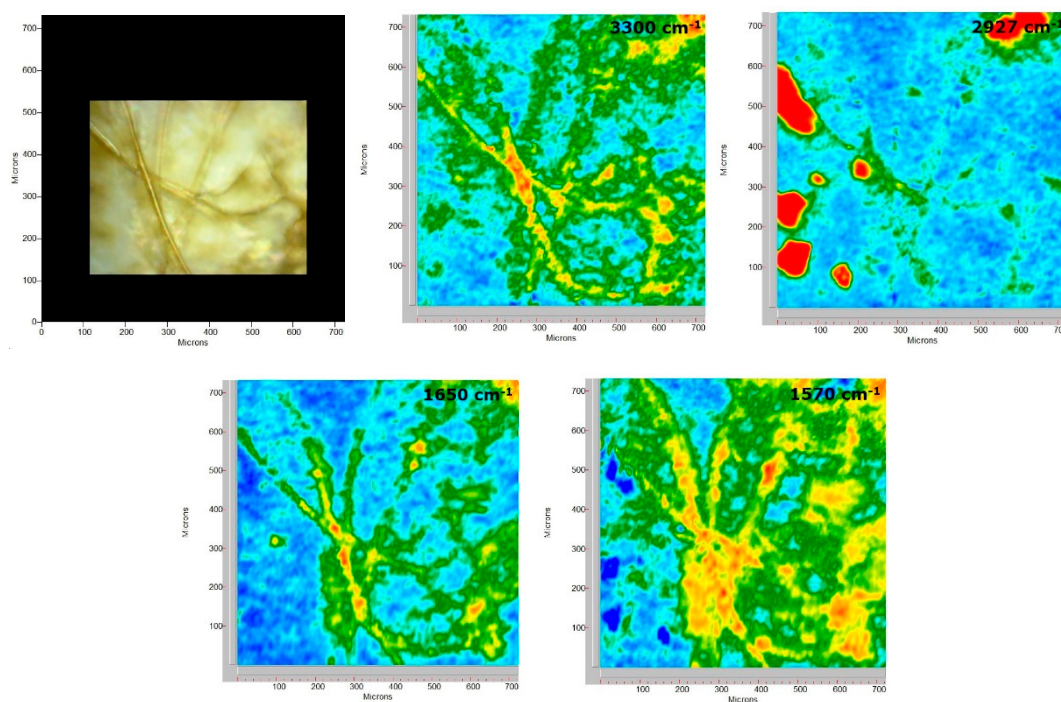

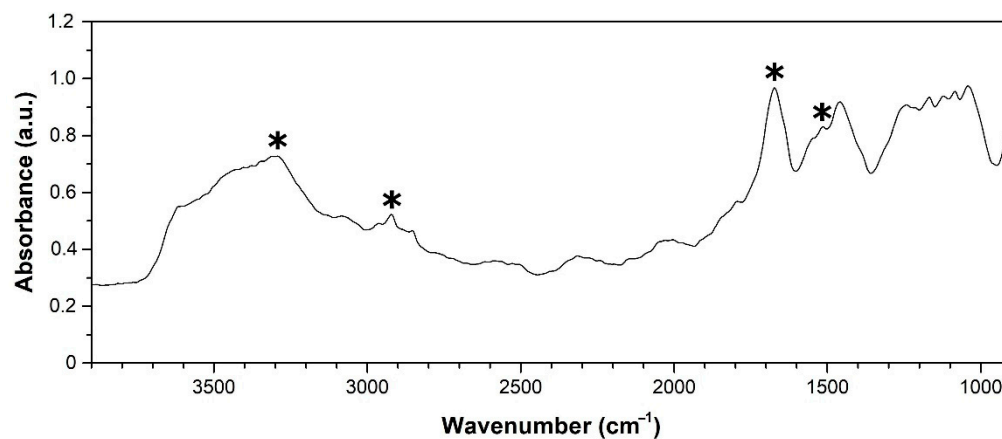

**Figure S3: Polyethylene terephthalate (PET).**

Bands at  $3,000\text{--}2,860\text{ cm}^{-1}$  (aromatic and aliphatic CH stretch region),  $1,730\text{ cm}^{-1}$  (C=O stretch),  $\sim 1,577$  and  $1,510\text{ cm}^{-1}$  (aromatic C=C stretch),  $1,410$  (aromatic skeleton stretch) and  $\sim 1,100\text{ cm}^{-1}$  (C-O stretch).

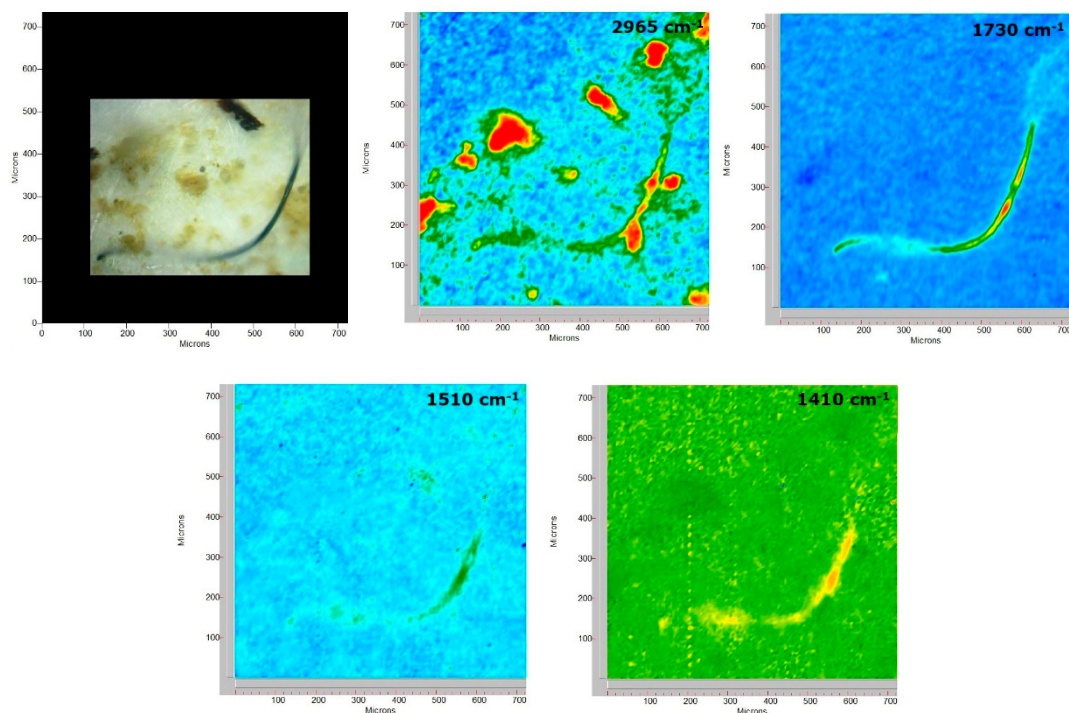

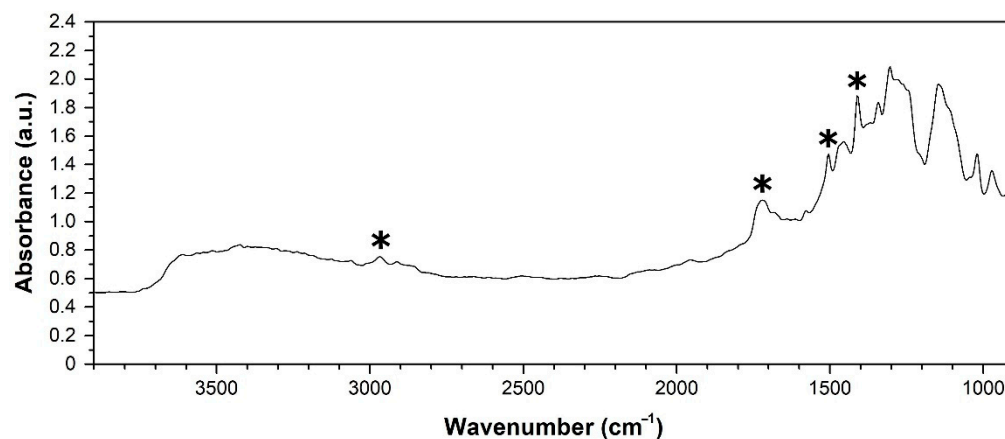

**Figure S4: PE and PE-PP blend**

PE is identified by absorption peaks at 2,920 and 2,850 cm<sup>-1</sup> (CH stretch region), and ~1,465 (δ CH<sub>2</sub>) cm<sup>-1</sup>. PP is identified by absorption peaks at 2,950, 2,915 and 2,856 cm<sup>-1</sup> (CH stretch region), at 1,458 (CH<sub>2</sub> bend), 1,373 (CH<sub>3</sub> bend) and 1,161 cm<sup>-1</sup> (CH bend, CH<sub>3</sub> rock, CC stretch). Based on these assignments, the spectra of the fiber and fragment in the two sets of figures below might be assigned to, respectively, a PE-PP blend and PP.

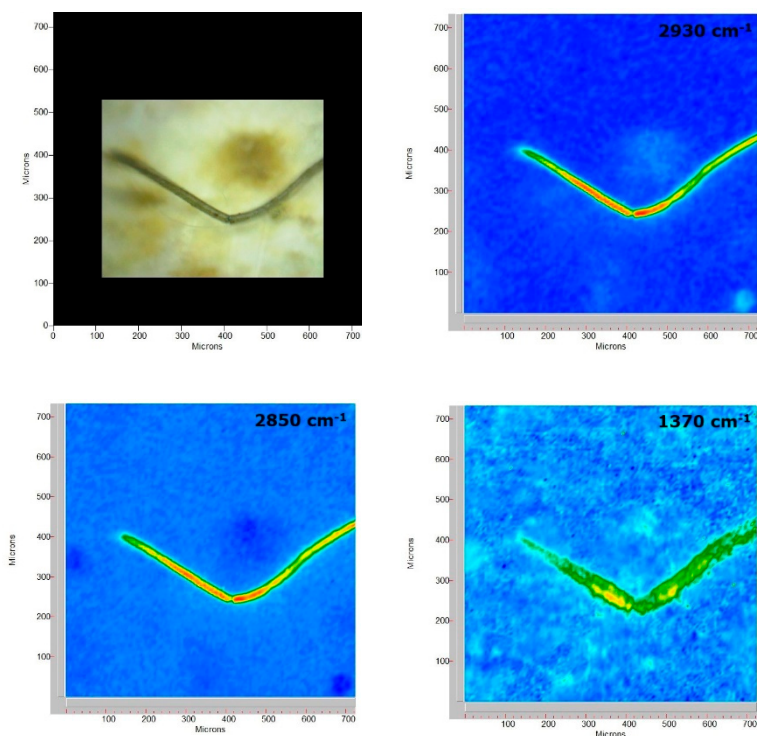

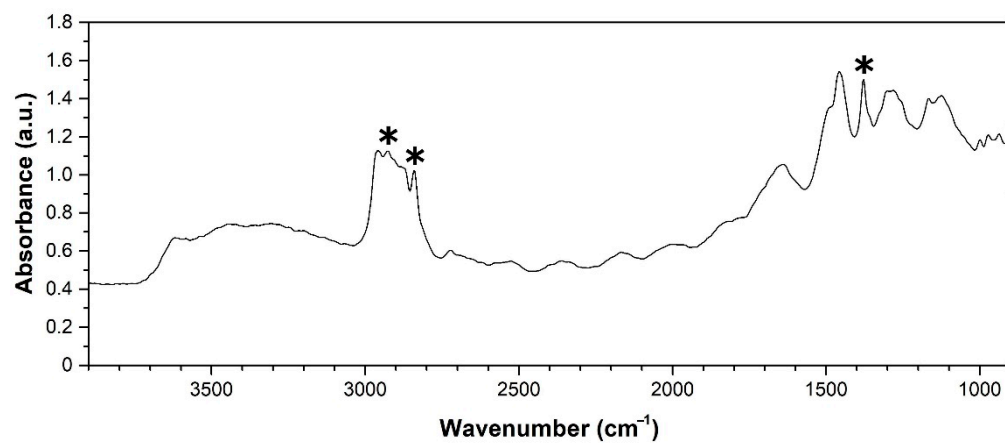

**Figure S5: Polypropylene (PP).**

Absorption peaks at 2,950, 2,915 and 2,856  $\text{cm}^{-1}$  (CH stretch region), at 1,458 ( $\text{CH}_2$  bend), 1,373 ( $\text{CH}_3$  bend) and 1,161  $\text{cm}^{-1}$  (CH bend,  $\text{CH}_3$  rock, CC stretch).

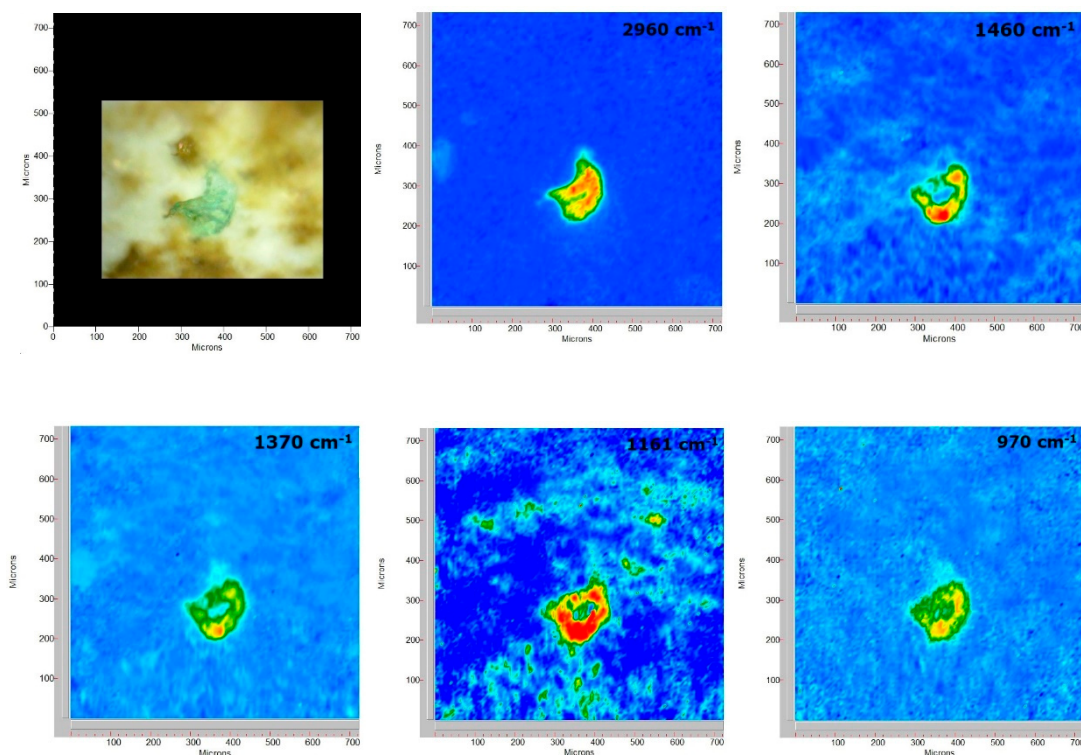



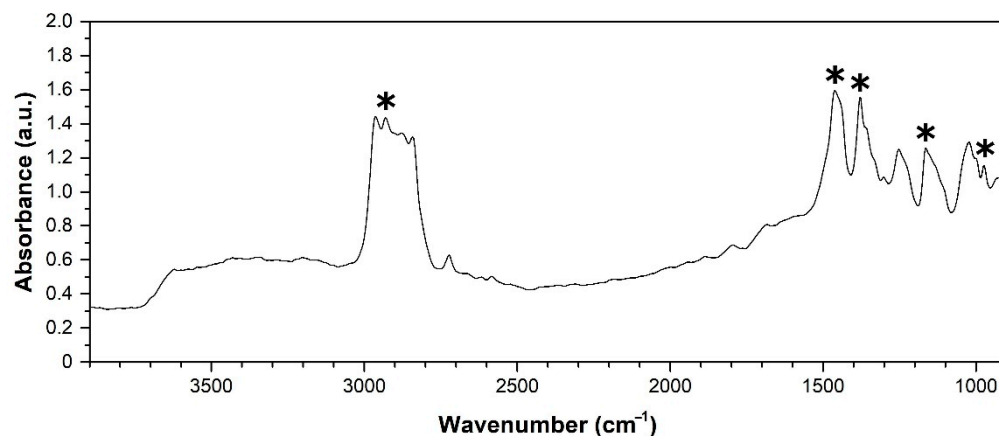

**Figure S6: Polytetrafluoroethylene (PTFE).**

PTFE is typically identified by two distinct peaks at  $\sim 1,200$  and  $1,150\text{ cm}^{-1}$ , assigned to the main peaks of polytetrafluoroethylene (PTFE), i.e.  $\text{CF}_2$  symmetric stretch bands. In our case, the peaks appear to be shifted to higher wavenumbers, and there is some overlap with the bands of the underlying glass fiber filter. However, we can still tentatively identify the polymer as PTFE based on the presence of the two strong absorptions, and also considering the lack of CH (see map at  $2,940\text{ cm}^{-1}$ , where no significant absorption from the fiber is observable as compared to the background filter absorption) and C=O stretching bands that rule out other polymer classes.

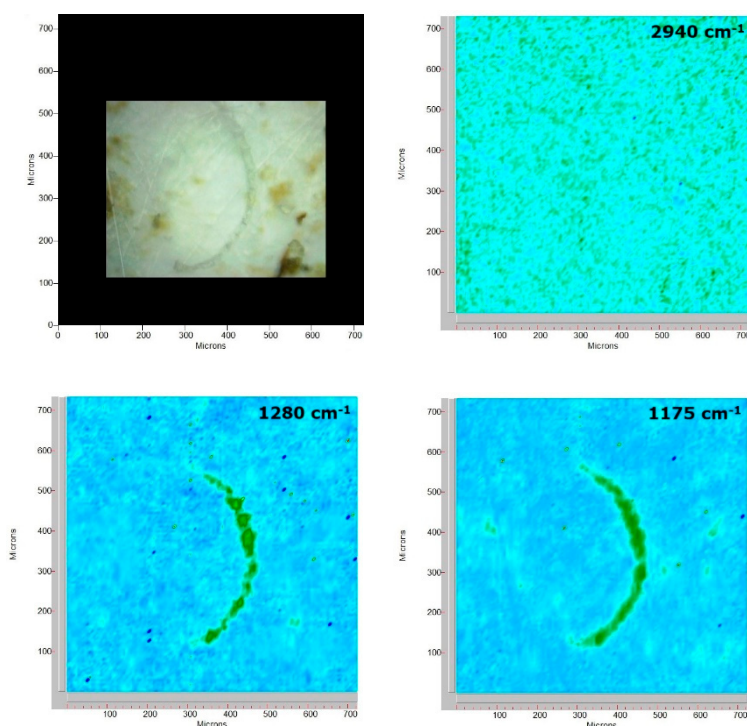

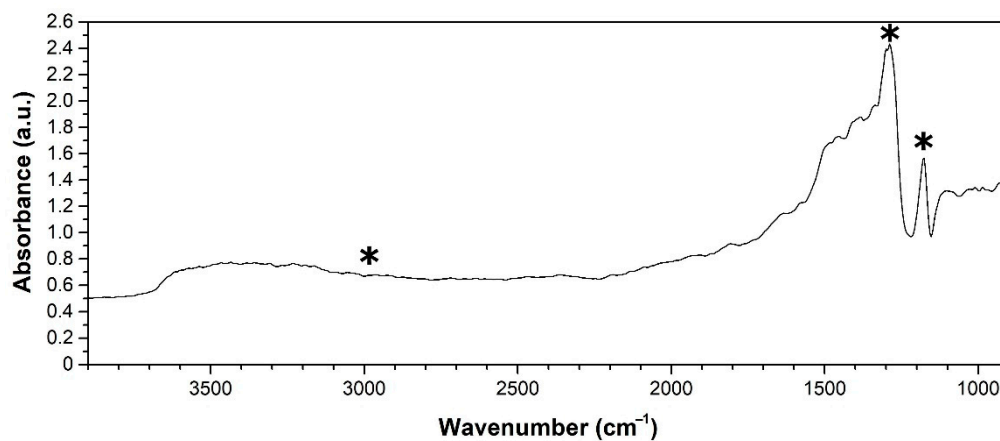

**Figure S7: Polyurethane (PU).**

PU is typically identified by peaks at  $\sim 1730$  ( $\text{C}=\text{O}$  stretch),  $1530$  ( $\text{C}-\text{N}$  stretch),  $1450$  ( $\text{CH}_2$  bend) and  $1225$   $\text{cm}^{-1}$  ( $\text{C}(\text{=O})\text{O}$ ). In our case, the  $\text{C}=\text{O}$  stretch band was very pronounced, while that at  $1530$  was less intense than what expected, which might be ascribed to a PU-acrylate composite. Overall, we assigned the fiber tentatively to a PU-based polymeric material.

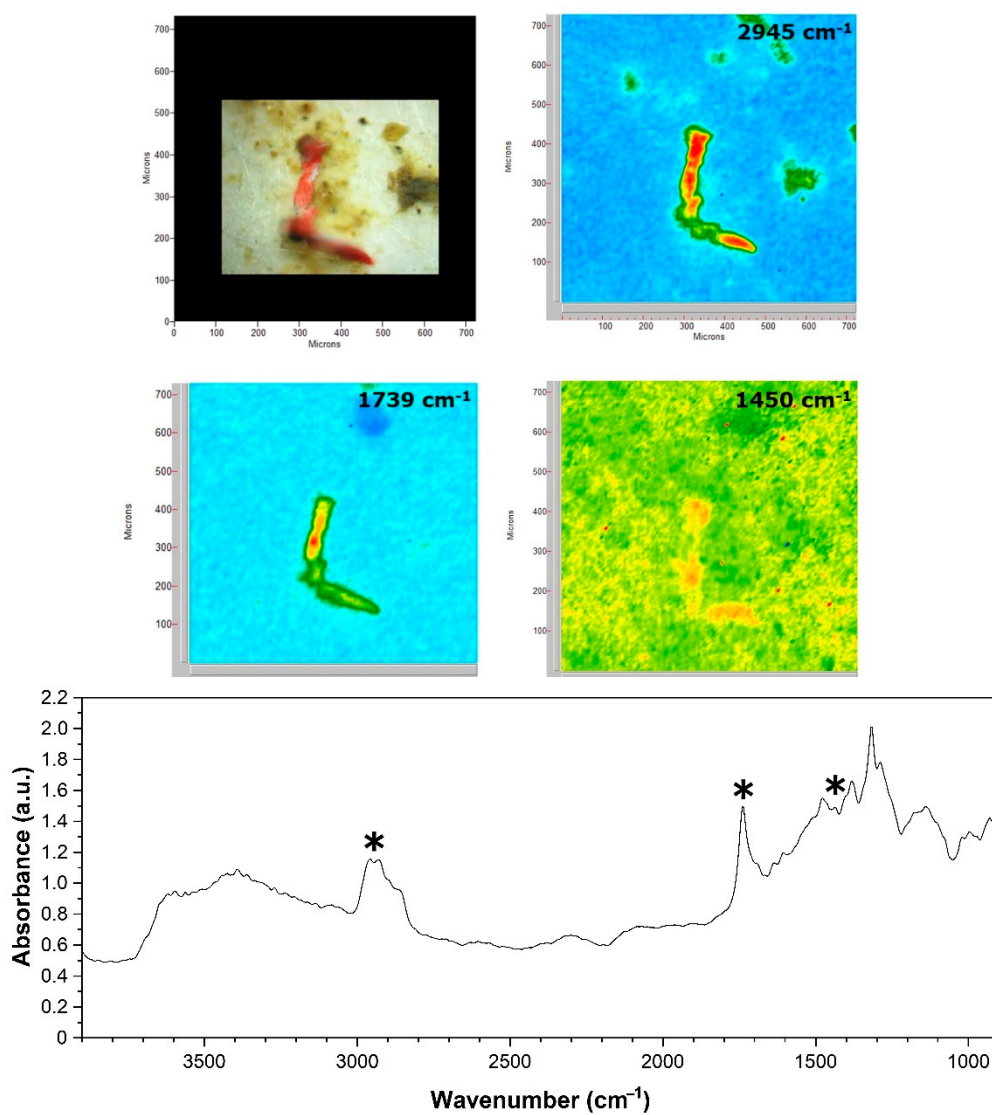

Supplement: s1 [file s1]
